# Supplementary material for: Patient Perspectives and Experiences of Preventive Treatments and Self-Injectable Devices for Migraine: A Focus Group Study
Source: PubMed Central journal article supplement — Patient. 2021 Jun 16;15(1):93–108. doi: 10.1007/s40271-021-00525-z (PMC8739468; doi:10.1007/s40271-021-00525-z), 2021-06-16
Supplement: 40271_2021_525_MOESM3_ESM.pdf [file 40271_2021_525_MOESM3_ESM.pdf]

**Title:** Patient perspectives and experiences of preventive treatments and self-injectable devices for migraine: a focus group study

**Journal:** *The Patient*

**Authors:** Jaein Seo<sup>1,\*</sup>, Charlie A. Smith<sup>2</sup>, Caitlin Thomas<sup>2</sup>, Tommi Tervonen<sup>2,3</sup>, Asha Harandeen<sup>2</sup>, Janet H. Ford<sup>4</sup>, Virginia L. Stauffer<sup>4</sup>, Robert A Nicholson<sup>4</sup>, Kevin Harrison Duffy<sup>4</sup>, Antje Tockhorn-Heidenreich<sup>4</sup>

**\*Corresponding author:** Jaein Seo, Evidera. E-mail: [Jaein.Seo@evidera.com](mailto:Jaein.Seo@evidera.com).

<sup>1</sup> Patient-Centered Research, Evidera, Bethesda, MD, USA

<sup>2</sup> Patient-Centered Research, Evidera, London, UK

<sup>3</sup> Department of Epidemiology, University Medical Center Groningen, University of Groningen, Groningen, The Netherlands

<sup>4</sup> Eli Lilly, Indianapolis, IN, USA

### Online Resource 3: Coding framework

| Groups                             | Code                                                  |
|------------------------------------|-------------------------------------------------------|
| Medication concerns/considerations | Drug-drug interactions                                |
|                                    | Tolerability                                          |
|                                    | Organ damage                                          |
| Coping strategies                  | Additional medical advice                             |
|                                    | Darkness/sunglasses                                   |
|                                    | Lie in bed for long period                            |
|                                    | Self-harm                                             |
| Medication expectations            | Ability to administer at any time (equally effective) |
|                                    | Ability to have normal life                           |
|                                    | Ability to self-administer                            |
|                                    | Able to socialize                                     |
|                                    | Environmentally friendly                              |
|                                    | Faster onset                                          |
|                                    | Minimal side effects                                  |
|                                    | No drug-drug interactions                             |
|                                    | Reduction of anxiety and stress                       |
|                                    | Reduction of nausea                                   |
|                                    | Absence of migraine                                   |
|                                    | Easy storage                                          |
|                                    | Easy to travel with                                   |
|                                    | Less frequent migraine                                |
|                                    | Less severe migraine                                  |
| Clear Instructions                 |                                                       |
| No severe side effects             |                                                       |
| Implications                       | Can't exercise                                        |
|                                    | Can't leave house                                     |
|                                    | Daily functioning                                     |
|                                    | Difficulty with childcare                             |
|                                    | Isolation                                             |
|                                    | Onset of depression                                   |
|                                    | Unable to drive                                       |
|                                    | Unable to work/study                                  |
| Side effects                       | Constipation                                          |
|                                    | Dizziness                                             |
|                                    | Emotion/mood                                          |
|                                    | Hallucinations                                        |

|                                        |                                             |
|----------------------------------------|---------------------------------------------|
|                                        | Hot flushes                                 |
|                                        | Lack of efficacy/decreasing efficacy        |
|                                        | Nausea                                      |
|                                        | Tingling                                    |
|                                        | Weight gain                                 |
|                                        | Weight loss                                 |
|                                        | Withdrawal effects                          |
|                                        | Communication problems                      |
|                                        | Concentration/thinking problems (cognition) |
|                                        | Diarrhoea                                   |
| Side effects                           | Heart palpitations                          |
| Reasons for medication discontinuation | Lethargy                                    |
|                                        | Nose bleeds                                 |
|                                        | Blood pressure problems                     |
|                                        | Weak pulse                                  |
| Symptoms                               | Concentration problems                      |
|                                        | Emotional problems                          |
|                                        | Memory/cognition                            |
|                                        | Nausea                                      |
|                                        | Pain                                        |
|                                        | Sensitivity to hot water                    |
|                                        | Sensitivity to light                        |
|                                        | Sensitivity to smell                        |
|                                        | Sensitivity to sound                        |
|                                        | Speech problems                             |
|                                        | Throbbing                                   |
|                                        | Tiredness                                   |
|                                        | Vision problem                              |
|                                        | Vomiting                                    |
| Medication concerns/considerations     | Ability to self-administer                  |
|                                        | Device breaking                             |
|                                        | Error/accidents                             |
|                                        | Illicit substance use                       |
|                                        | Needle disposal                             |
|                                        | Child safety                                |
|                                        | Financial cost                              |
|                                        | Transportation risk                         |
|                                        | Long-term unknown risks                     |
|                                        | Environmental concerns                      |
|                                        | Storage                                     |
| Device characteristics                 | Fear of not receiving medicine              |
|                                        | Device familiarity                          |
|                                        | Device grip                                 |
|                                        | Device lock/security                        |
|                                        | Device shape                                |
|                                        | Device size                                 |
|                                        | Device stability                            |
|                                        | Environmental                               |
|                                        | Flange size                                 |
|                                        | Large base                                  |
|                                        | Manual injection/administration             |
|                                        | Multiple steps of administration            |
|                                        | Needle                                      |

|                       |                                    |
|-----------------------|------------------------------------|
|                       | Needle shield                      |
|                       | Pinching of skin                   |
|                       | Pressure-delivery method           |
|                       | Simple device                      |
|                       | Thumb rest                         |
|                       | Time to inject                     |
|                       | Weight                             |
|                       | Window                             |
|                       | Angle of injection                 |
|                       | Automatic functions                |
|                       | Basic injection                    |
|                       | Capability of removing parts       |
| Visual impressions    | Old fashioned appearance           |
|                       | Clumsy appearance                  |
|                       | Toy appearance                     |
|                       | Overengineered appearance          |
|                       | Resemblance to insulin             |
|                       | Scary appearance                   |
| Ranking Exercise/PT 3 | Frequency of administration        |
|                       | Symptoms over device functionality |
|                       | Disposal/waste                     |
|                       | Less invasive administration       |
|                       | Effectiveness of medication        |
|                       | Decrease frequency of attacks      |
|                       | Device portability                 |
|                       | Needle visibility                  |
|                       | Severity of headaches- examples    |
|                       | Portability                        |
|                       | Dose confirmation window           |
|                       | Memory problems                    |
|                       | Pressing button                    |
|                       | Time for dose to complete          |
|                       | Type of device                     |
