# Supplementary material for: Patient Perspectives and Experiences of Preventive Treatments and Self-Injectable Devices for Migraine: A Focus Group Study
Source: PubMed Central journal article supplement — Patient. 2021 Jun 16;15(1):93–108. doi: 10.1007/s40271-021-00525-z (PMC8739468; doi:10.1007/s40271-021-00525-z), 2021-06-16
Supplement: 40271_2021_525_MOESM4_ESM.pdf [file 40271_2021_525_MOESM4_ESM.pdf]

**Title:** Patient perspectives and experiences of preventive treatments and self-injectable devices for migraine: a focus group study

**Journal:** The Patient

**Authors:** Jaein Seo<sup>1,\*</sup>, Charlie A. Smith<sup>2</sup>, Caitlin Thomas<sup>2</sup>, Tommi Tervonen<sup>2,3</sup>, Asha Harandeen<sup>2</sup>, Janet H. Ford<sup>4</sup>, Virginia L. Stauffer<sup>4</sup>, Robert A Nicholson<sup>4</sup>, Kevin Harrison Duffy<sup>4</sup>, Antje Tockhorn-Heidenreich<sup>4</sup>

**\*Corresponding author:** Jaein Seo, Evidera. E-mail: [Jaein.Seo@evidera.com](mailto:Jaein.Seo@evidera.com).

<sup>1</sup> Patient-Centered Research, Evidera, Bethesda, MD, USA

<sup>2</sup> Patient-Centered Research, Evidera, London, UK

<sup>3</sup> Department of Epidemiology, University Medical Center Groningen, University of Groningen, Groningen, The Netherlands

<sup>4</sup> Eli Lilly, Indianapolis, IN, USA

**Online Resource 4: Saturation Grid**

| Theme                    | Subtheme                                               | Focus group |      |      |      |      |      |      |      |      |
|--------------------------|--------------------------------------------------------|-------------|------|------|------|------|------|------|------|------|
|                          |                                                        | US01        | DE01 | US02 | UK01 | US03 | DE02 | DE03 | UK03 | UK02 |
| Expectations             | Ability to administer anytime with equal effectiveness |             |      |      |      |      | *    |      |      |      |
|                          | Normal life                                            |             | *    | *    | *    |      | *    |      |      | *    |
|                          | Ability to self-administer                             |             |      |      |      | *    |      |      |      |      |
|                          | Ability to socialise                                   |             | *    |      |      |      |      |      |      |      |
|                          | Environmentally friendly                               |             |      |      |      | *    |      |      |      |      |
|                          | Faster onset                                           |             |      |      |      |      |      | *    |      |      |
|                          | Minimal side effects                                   | *           |      |      |      |      | *    | *    |      |      |
|                          | No drug-drug interactions                              |             |      |      |      | *    |      | *    |      |      |
|                          | Reduced stress/anxiety                                 |             |      |      |      |      |      | *    |      |      |
|                          | Reduced nausea                                         |             |      | *    | *    |      |      |      |      |      |
|                          | Absence of migraines                                   |             | *    | *    | *    |      |      | *    | *    |      |
|                          | Easy storage                                           |             |      |      |      |      |      |      |      |      |
|                          | Easy to travel with                                    |             |      |      |      |      |      |      |      |      |
|                          | Reduced frequency of migraines                         | *           |      | *    | *    |      |      | *    | *    |      |
|                          | Reduced severity of migraines                          | *           | *    | *    | *    | *    |      | *    | *    |      |
| No severe side effects   |                                                        |             |      |      | *    |      |      |      | *    |      |
| Clear steps/instructions | *                                                      |             |      |      |      |      | *    |      |      |      |

| Theme                  | Subtheme                        | Focus group |      |      |      |      |      |      |      |      |
|------------------------|---------------------------------|-------------|------|------|------|------|------|------|------|------|
|                        |                                 | US01        | DE01 | US02 | UK01 | US03 | DE02 | DE03 | UK03 | UK02 |
| Concerns               | Constipation                    | *           |      |      |      |      |      |      |      | *    |
|                        | Dizziness                       |             |      |      |      |      |      |      | *    |      |
|                        | Emotional/mood problems         | *           |      | *    | *    |      | *    |      | *    |      |
|                        | Hallucinations                  |             |      |      | *    |      |      |      |      |      |
|                        | Hot flushes                     |             |      |      |      |      |      |      |      | *    |
|                        | Decreased efficiency            |             |      |      | *    |      |      |      |      | *    |
|                        | Nausea                          |             |      | *    |      |      |      | *    |      | *    |
|                        | Tingling                        |             |      |      |      |      |      |      | *    |      |
|                        | Weight gain                     | *           |      | *    | *    |      | *    |      |      |      |
|                        | Weight loss                     |             |      |      |      |      |      | *    |      |      |
|                        | Withdrawal                      |             |      |      | *    |      |      |      |      |      |
|                        | Blood pressure problems         |             |      |      |      | *    |      |      |      |      |
|                        | Communication problems          | *           |      |      | *    |      |      |      |      |      |
|                        | Concentration/thinking problems | *           |      |      | *    |      |      |      |      |      |
|                        | Diarrhoea                       |             |      |      |      |      |      |      |      | *    |
|                        | Heart palpitations              |             |      |      |      |      |      |      | *    |      |
|                        | Lethargy                        |             |      |      | *    |      | *    |      | *    | *    |
| Nose bleeds            |                                 |             |      |      |      |      |      | *    |      |      |
| Weak pulse             |                                 |             |      |      |      |      | *    |      |      |      |
| Device characteristics | Angle of injection              | *           | *    |      |      |      |      |      | *    |      |
|                        | Automatic functions             | *           | *    | *    | *    | *    | *    |      | *    | *    |
|                        | Device familiarity              |             | *    |      | *    | *    | *    |      | *    |      |
|                        | Device grip                     | *           | *    | *    |      | *    | *    | *    |      | *    |
|                        | Device lock/security            |             | *    |      |      | *    |      | *    | *    |      |
|                        | Device shape                    | *           |      | *    |      | *    |      | *    |      |      |
|                        | Device Size                     | *           | *    | *    | *    | *    | *    |      | *    | *    |
|                        | Device stability                |             | *    |      | *    |      |      |      |      | *    |
|                        | Flange size                     | *           |      |      |      |      |      |      |      |      |
|                        | Large base                      | *           | *    |      |      |      | *    |      |      |      |
|                        | Manual injection                |             | *    |      |      |      | *    |      |      | *    |
|                        | Steps of administration         | *           | *    | *    |      | *    | *    | *    | *    |      |
|                        | Needle                          | *           | *    | *    | *    |      |      |      |      |      |
|                        | Needle shield                   | *           | *    | *    | *    | *    |      | *    | *    | *    |
|                        | Pinching of skin                | *           | *    | *    | *    |      |      | *    | *    |      |
|                        | Pressure-delivery method        | *           |      |      |      | *    | *    | *    | *    |      |
|                        | Simplicity of device            |             |      |      | *    | *    | *    | *    | *    | *    |
|                        | Thumb rest                      | *           |      |      |      |      |      |      |      | *    |
|                        | Time to inject                  | *           |      |      | *    | *    | *    | *    | *    | *    |
|                        | Weight                          |             | *    |      |      |      | *    |      | *    |      |
| Window                 | *                               | *           |      |      | *    | *    | *    | *    |      |      |
