# Supplementary material for: Patient Perspectives and Experiences of Preventive Treatments and Self-Injectable Devices for Migraine: A Focus Group Study
Source: PubMed Central journal article supplement — Patient. 2021 Jun 16;15(1):93–108. doi: 10.1007/s40271-021-00525-z (PMC8739468; doi:10.1007/s40271-021-00525-z), 2021-06-16
Supplement: 40271_2021_525_MOESM5_ESM.pdf [file 40271_2021_525_MOESM5_ESM.pdf]

**Title:** Patient perspectives and experiences of preventive treatments and self-injectable devices for migraine: a focus group study

**Journal:** *The Patient*

**Authors:** Jaein Seo<sup>1,\*</sup>, Charlie A. Smith<sup>2</sup>, Caitlin Thomas<sup>2</sup>, Tommi Tervonen<sup>2,3</sup>, Asha Harandeen<sup>2</sup>, Janet H. Ford<sup>4</sup>, Virginia L. Stauffer<sup>4</sup>, Robert A Nicholson<sup>4</sup>, Kevin Harrison Duffy<sup>4</sup>, Antje Tockhorn-Heidenreich<sup>4</sup>

**\*Corresponding author:** Jaein Seo, Evidera. E-mail: [Jaein.Seo@evidera.com](mailto:Jaein.Seo@evidera.com).

<sup>1</sup> Patient-Centered Research, Evidera, Bethesda, MD, USA

<sup>2</sup> Patient-Centered Research, Evidera, London, UK

<sup>3</sup> Department of Epidemiology, University Medical Center Groningen, University of Groningen, Groningen, The Netherlands

<sup>4</sup> Eli Lilly, Indianapolis, IN, USA

#### Online Resource 5: Themes and illustrative quotations related to the impact of migraine symptoms on daily activities

| Theme                                          | Illustrative quotation [participant ID]                                                                                                                                                                                                                                                 |
|------------------------------------------------|-----------------------------------------------------------------------------------------------------------------------------------------------------------------------------------------------------------------------------------------------------------------------------------------|
| Migraine makes driving difficult or impossible | <i>"I would lose the vision and right now because of the migraines I don't drive at night"</i> [US03-100]                                                                                                                                                                               |
|                                                | <i>"We can't drive or we can't reliably drive so then my husband has to take the day off work to drive me"</i> [US03-103]                                                                                                                                                               |
|                                                | <i>"The ocular headaches they don't come that frequently but when they come, they're so bad that if I'm driving I'm always afraid I might be driving, because in the instance that I have been driving, I have to pull over because I lose vision completely in one eye"</i> [US03-104] |
| It can be hard to look after children          | <i>"I have a daughter [...] When I get a migraine attack, you know, she knows it's coming. My speech becomes very slurred. I become very moody, everything has gone [...] She just has to look after herself; that includes brushing her teeth, putting herself to bed"</i> [UK03-102]  |
| I can barely get out of bed                    | <i>"When I get headaches, migraines especially, I might as well just stay in bed"</i> [US01-007]                                                                                                                                                                                        |
|                                                | <i>"I just felt suicidal, I couldn't get out of bed, I was crawling around on the floor to get to the bathroom, I was doing it in the dark with my eyes shut"</i> [UK01-010]                                                                                                            |
|                                                | <i>"I have migraine at times, still, and I even vomit at times due to that, then I go to my bedroom, everything is dark, but that's that"</i> [DE01-031]                                                                                                                                |
|                                                | <i>"In case I have more severe attacks, I would not describe them as earthquakes, or something like that. And I am not completely unable to do anything. I still could go to the toilet for instance, fortunately."</i> [DE01-037]                                                      |

| Theme                                                                                                                                                                  | Illustrative quotation [participant ID]                                                                                                                                                                                                                                                                                             |
|------------------------------------------------------------------------------------------------------------------------------------------------------------------------|-------------------------------------------------------------------------------------------------------------------------------------------------------------------------------------------------------------------------------------------------------------------------------------------------------------------------------------|
| My ability to work or attend school is impaired                                                                                                                        | <i>"I shifted from working at a restaurant under bulb lighting to liquor stores with [...] fluorescent lights [...] you talk about light fatigue [...] job changed"</i> [US03-101]                                                                                                                                                  |
|                                                                                                                                                                        | <i>"I quit my online job, now I just do part time because I just could not..."</i> [US03-103]                                                                                                                                                                                                                                       |
|                                                                                                                                                                        | <i>"I had to have many times off school episodes of two, three, four days where I just had to stay in bed because I had a thumping throb in my head"</i> [UK01-002]                                                                                                                                                                 |
|                                                                                                                                                                        | <i>"I work in a very high-stress, high-functioning role. I write reports for a living, and my ability to write [...] just my overall writing style, the complexity of the language that I'm using, [...] my understanding of the topic, all of that is very much impaired. I kind of feel like I'm half functioning"</i> [UK03-032] |
|                                                                                                                                                                        | <i>"...daily migraine. That is why currently I am not able to work, unfortunately"</i> [DE03-042]                                                                                                                                                                                                                                   |
| <i>"[Migraine symptoms/attacks occur] often at night. That has got the benefit that I can work almost all the time because it occurs at night usually."</i> [DE03-044] |                                                                                                                                                                                                                                                                                                                                     |
