# Supplementary material for: Patient Perspectives and Experiences of Preventive Treatments and Self-Injectable Devices for Migraine: A Focus Group Study
Source: PubMed Central journal article supplement — Patient. 2021 Jun 16;15(1):93–108. doi: 10.1007/s40271-021-00525-z (PMC8739468; doi:10.1007/s40271-021-00525-z), 2021-06-16
Supplement: 40271_2021_525_MOESM6_ESM.pdf [file 40271_2021_525_MOESM6_ESM.pdf]

**Title:** Patient perspectives and experiences of preventive treatments and self-injectable devices for migraine: a focus group study

**Journal:** *The Patient*

**Authors:** Jaein Seo, Charlie A. Smith, Caitlin Thomas, Tommi Tervonen, Asha Harandeen, Janet H. Ford, Virginia L. Stauffer, Robert A. Nicholson, Kevin Harrison Duffy, Antje Tockhorn-Heidenreich

**Corresponding author:** Jaein Seo, Evidera. E-mail: [Jaein.Seo@evidera.com](mailto:Jaein.Seo@evidera.com).

**Online Resource 6: Ranking of treatment characteristics by each focus group**

|                                       |                                                       |      |
|---------------------------------------|-------------------------------------------------------|------|
| <b>US01</b><br>(EM, n=5)              | Number of days with migraine                          | 1st  |
|                                       | Severity of migraine                                  | 2nd  |
|                                       | Concentration problems                                | 3rd  |
|                                       | Time it takes to inject medicine                      | 3rd  |
|                                       | Easy to hold                                          | 5th  |
|                                       | Pressing the button/plunger                           | 6th  |
|                                       | Dose confirmation window                              | 7th  |
| <b>US02</b><br>(CM, n=5)              | Less frequent migraine                                | 1st  |
|                                       | Less intense migraine                                 | 2nd  |
|                                       | Size of the device                                    | 3rd  |
|                                       | Design, appearance of the device                      | 4th  |
|                                       | Needle protection                                     | 5th  |
|                                       | Disposal                                              | 6th  |
| <b>US03</b><br>(CM, n=4)              | Vision problem of migraine                            | 1st  |
|                                       | Portability                                           | 2nd  |
|                                       | Time it takes to inject                               | 3rd  |
|                                       | Disposal/environmental concerns                       | 4th  |
|                                       | Dose confirmation window                              | 5th  |
|                                       | Needle visibility                                     | 6th  |
|                                       | Pressing button                                       | 7th  |
| <b>UK01</b><br>(EM, n=5)<br>(CM, n=1) | Severity of headaches                                 | 1st  |
|                                       | Frequency of headaches                                | 2nd  |
|                                       | Nausea                                                | 3rd  |
|                                       | Fatigue                                               | 4th  |
|                                       | Memory problems                                       | 5th  |
|                                       | Time for dose completion                              | 5th  |
|                                       | Type of device                                        | 7th  |
| <b>UK02</b><br>(CM, n=3)<br>(EM, n=1) | Reduction in migraine severity                        | 1st  |
|                                       | Reduction in migraine frequency                       | 1st  |
|                                       | Side effects                                          | 3rd  |
|                                       | Loss of efficacy of acute migraine treatment          | 4th  |
|                                       | Type of device (autoinjector vs. prefilled syringe)   | 5th  |
|                                       | Time for injection to complete                        | 6th  |
|                                       | Need to pinch skin                                    | 7th  |
| <b>UK03</b><br>(CM, n=4)<br>(EM, n=3) | Reduce frequency of migraine episodes                 | 1st  |
|                                       | Reduced duration of migraine episodes                 | 2nd  |
|                                       | Frequency of injection                                | 3rd  |
|                                       | Number of steps during injection                      | 4th  |
|                                       | Safety mechanics of device                            | 5th  |
|                                       | Portability of device                                 | 6th  |
| <b>DE01</b><br>(EM, n=5)              | Decrease frequency of migraine                        | 1st  |
|                                       | Decrease intensity of migraine                        | 2nd  |
|                                       | Maintenance of functionality/being able to work       | 2nd  |
|                                       | Frequency of application                              | 4th  |
|                                       | Disposal/waste                                        | 5th  |
|                                       | Device handling                                       | 6th  |
|                                       | Injection site pain                                   | 7th  |
|                                       | Length of injection                                   | 8th  |
| Side effects                          | 9th                                                   |      |
| <b>DE02</b><br>(CM, n=1)<br>(EM, n=4) | Reduction of migraine frequency                       | 1st  |
|                                       | Few side effects (psychological effects, weight gain) | 2nd  |
|                                       | Reduction in intensity/severity of migraine           | 3rd  |
|                                       | Creates normality (no burden of disease)              | 4th  |
|                                       | Good information about the drug                       | 5th  |
|                                       | Easy and safe use (syringe, pen)                      | 6th  |
|                                       | Reimbursement / access / bureaucracy                  | 7th  |
|                                       | Size and weight of applicator                         | 8th  |
|                                       | Handling, practicality                                | 9th  |
|                                       | Disposal/waste                                        | 10th |
| <b>DE03</b><br>(CM, n=4)<br>(EM, n=2) | Less migraine attacks (lower frequency)               | 1st  |
|                                       | Few side effects                                      | 2nd  |
|                                       | Participation in social life possible                 | 2nd  |
|                                       | Lower intensity of pain in migraine                   | 4th  |
|                                       | Faster onset, easy on and off                         | 5th  |
|                                       | Frequency of administration                           | 6th  |
|                                       | Easy and self-explanatory application                 | 7th  |
|                                       | Pain when applied                                     | 8th  |
|                                       | Easy explanation, description                         | 9th  |
|                                       | Multiple use (refill)                                 | 10th |
|                                       | Storage/disposal                                      | 11th |
